# Supplementary material for: Techniques féminines moose dans le Yatenga, Burkina Faso
Source: Royal Society of Chemistry journal article supplement (doi:10.1039/d4fo00075g), 1993-01-01
Supplement: d4fo00075g1.pdf [file d4fo00075g1.pdf]

## Supplemental figures

### **Evaluation of Verbascum flower extracts as a natural source of crocins pigments with potential health benefits**

[Lucía Morote<sup>1,a</sup>](#), [Cristian Martínez Fajardo<sup>1,a</sup>](#), [Eduardo Parreño<sup>1</sup>](#), [Alberto José López Jiménez<sup>1,2</sup>](#), [Alejandro Santiago<sup>3</sup>](#), [Oussama Ahrazem<sup>1,2</sup>](#), [Ángela Rubio-Moraga<sup>1,2</sup>](#), [Lourdes Gómez-Gómez<sup>1,4,\\*</sup>](#)

<sup>1</sup>Instituto Botánico. Departamento de Ciencia y Tecnología Agroforestal y Genética. Universidad de Castilla-La Mancha, Campus Universitario s/n, 02071 Albacete, Spain.

<sup>2</sup>Escuela Técnica Superior de Ingenieros Agrónomos y de Montes y Biotecnología. Departamento de Ciencia y Tecnología Agroforestal y Genética. Universidad de Castilla-La Mancha, Campus Universitario s/n, 02071 Albacete, Spain.

<sup>3</sup>Jardín Botánico de Castilla-La Mancha, Av. de la Mancha s/n, 02006 Albacete, Spain.

<sup>4</sup>Facultad de Farmacia, Universidad de Castilla-La Mancha, Campus Universitario s/n, 02071 Albacete, Spain.

<sup>a</sup>Both authors equally contributed to this work.

\*Corresponding author: Lourdes Gómez Gómez

E-mail: [marialourdes.gomez@uclm.es](mailto:marialourdes.gomez@uclm.es)

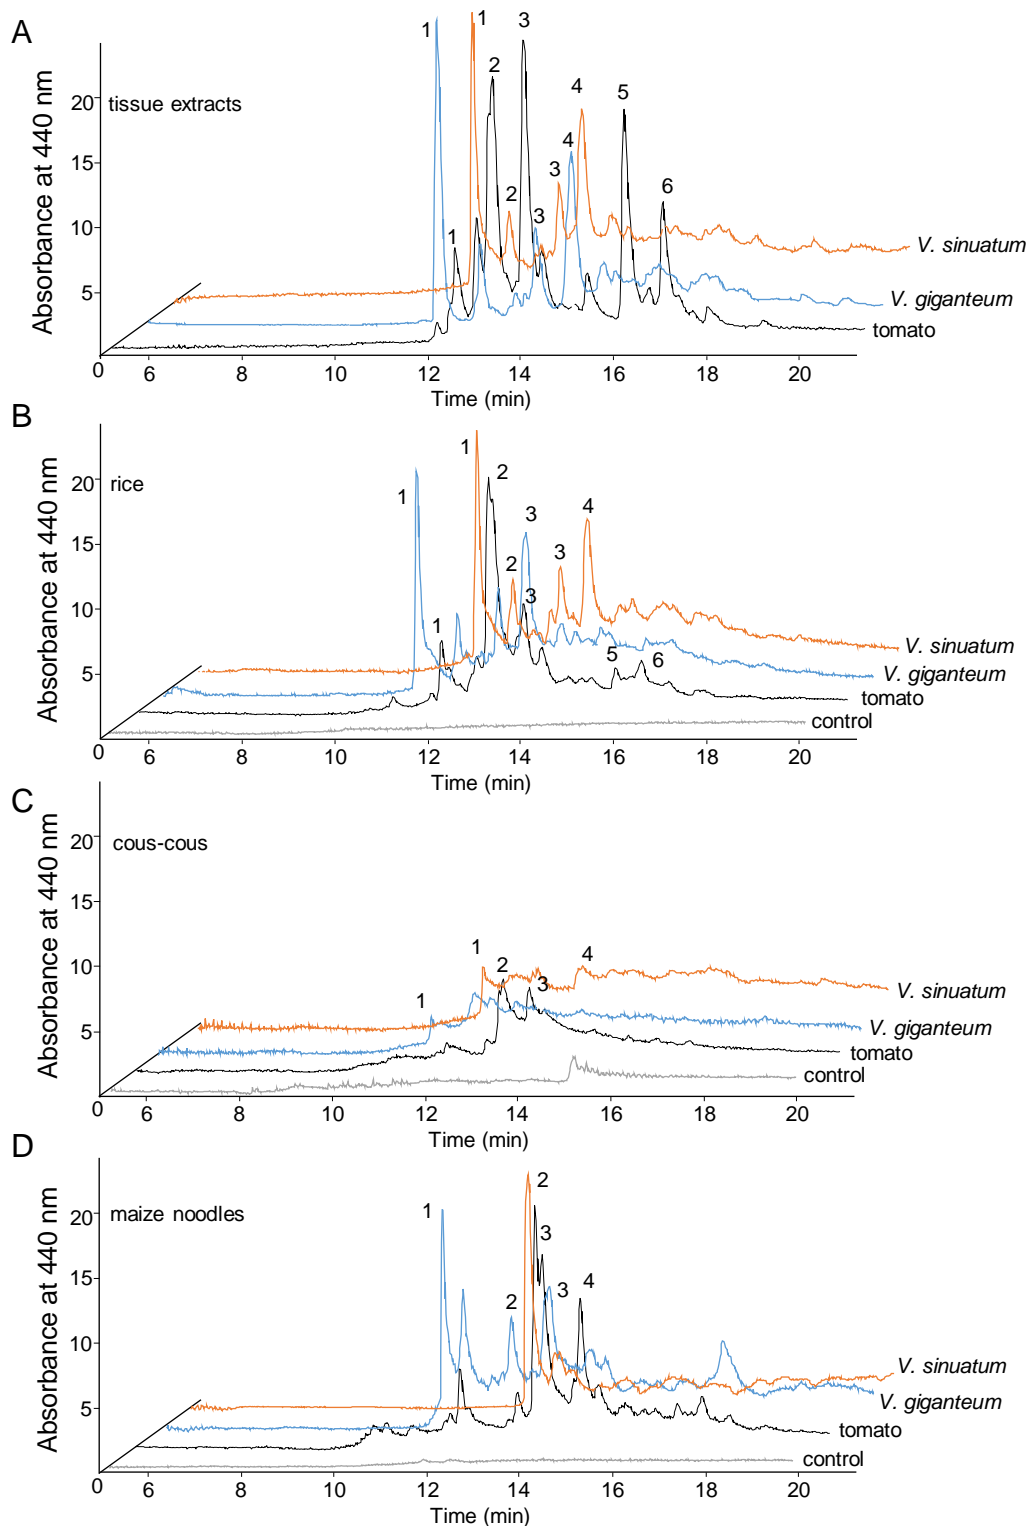

Supplementary Fig. S1. Crocins profiles obtained at 440 nm from polar extracts of different samples. A) Chromatogram profile of polar extracts obtained from flowers of *Verbascum sinuatum* and *V. giganteum*, and from fruits of tomato plants engineered for the accumulation of crocins. B) Chromatogram profile of polar extracts obtained from rice cooked in the presence of flowers of *Verbascum sinuatum* and *V. giganteum*, and from fruits of tomato plants engineered for the accumulation of crocins. C) Chromatogram profile of polar extracts obtained from cous-cous cooked in the presence of flowers of *Verbascum sinuatum* and *V. giganteum*, and from fruits of tomato plants engineered for the accumulation of crocins. D) Chromatogram profile of polar extracts obtained from maize noodles cooked in the presence of flowers of *Verbascum sinuatum* and *V. giganteum*, and from fruits of tomato plants engineered for the accumulation of crocins. Numbers correspond to: t-c4(1), t-c3(2), t-c2(3), t-c2'(4), t-c1(5), c-c1(6).

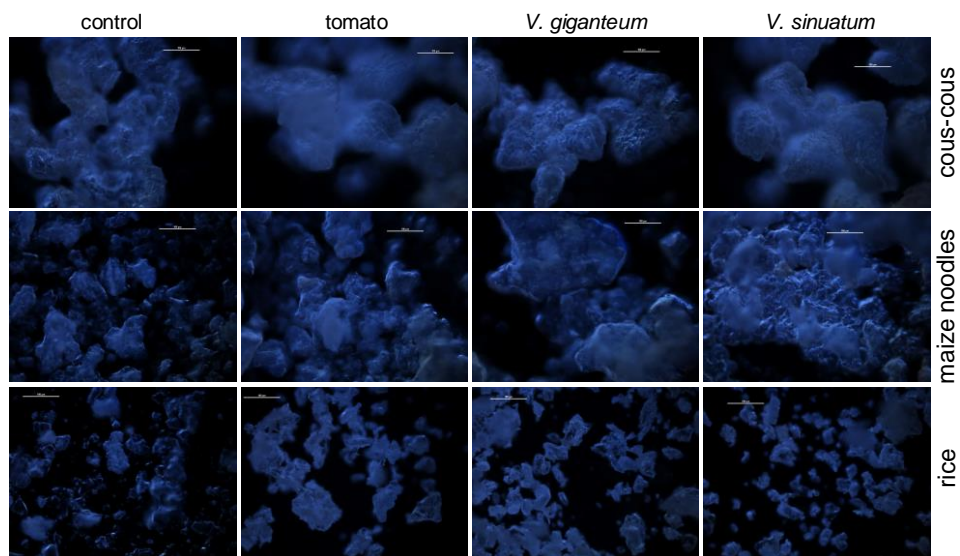

Supplementary Fig. S2. Microscope images of cooked, dried and pulverized food matrices with the different extracts.

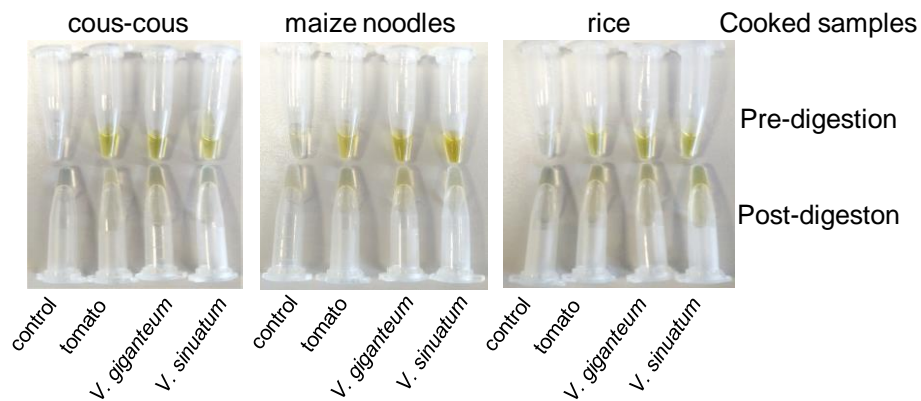

Supplementary Fig. S3. Polar extracts containing crocins obtained from the cooked samples. In the upper part of the image are shown the polar extracts from the cooked samples, and below are shown the polar extracts obtained from the digested samples.
